# Supplementary material for: Co2P nanowire arrays anchored on a 3D porous reduced graphene oxide matrix embedded in nickel foam for a high-efficiency hydrogen evolution reaction
Source: Royal Society of Chemistry journal article supplement (doi:10.1039/d3dt01367g), 2023-01-01
Supplement: d3dt01367g1.pdf [file d3dt01367g1.pdf]

## Supplementary Information

### **Co<sub>2</sub>P nanowire arrays anchored on 3D porous reduced graphene oxide matrix embedded in nickel foam for high-efficiency hydrogen evolution reaction**

Yuanqiang Wang\*, Ting Wang, Mengru Yang, Yichuan Rui, Zhili Xue, Haozhen Zhu,  
Chengjie Wang, Jing Li, Binling Chen

*College of Chemistry and Chemical Engineering, Shanghai University of Engineering  
Science, Shanghai 201620, China*

\*Corresponding author.

E-mail: yuanqiangw@sues.edu.cn (Y. Q. Wang).

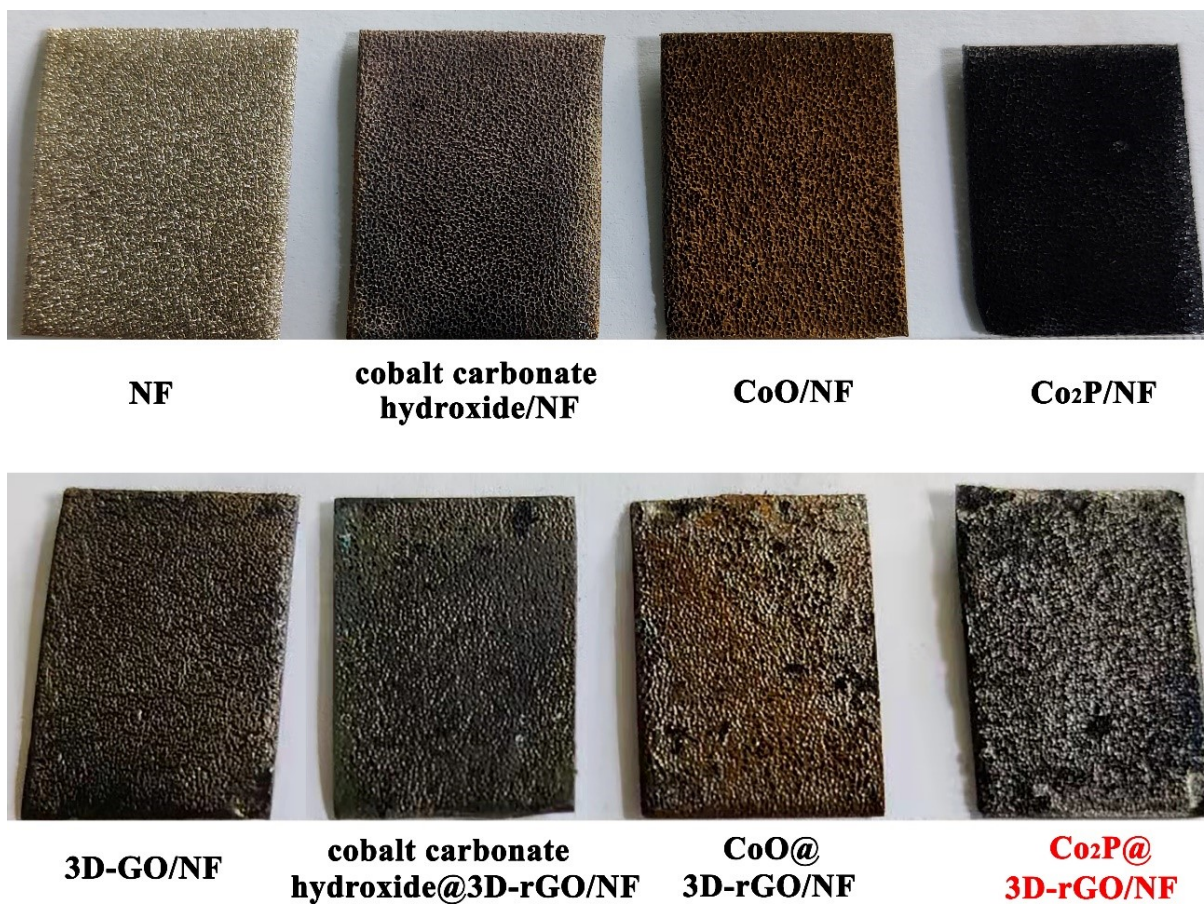

**Fig. S1.** Digital photographs of the samples during the preparation of Co<sub>2</sub>P/NF and Co<sub>2</sub>P@3D-rGO/NF.

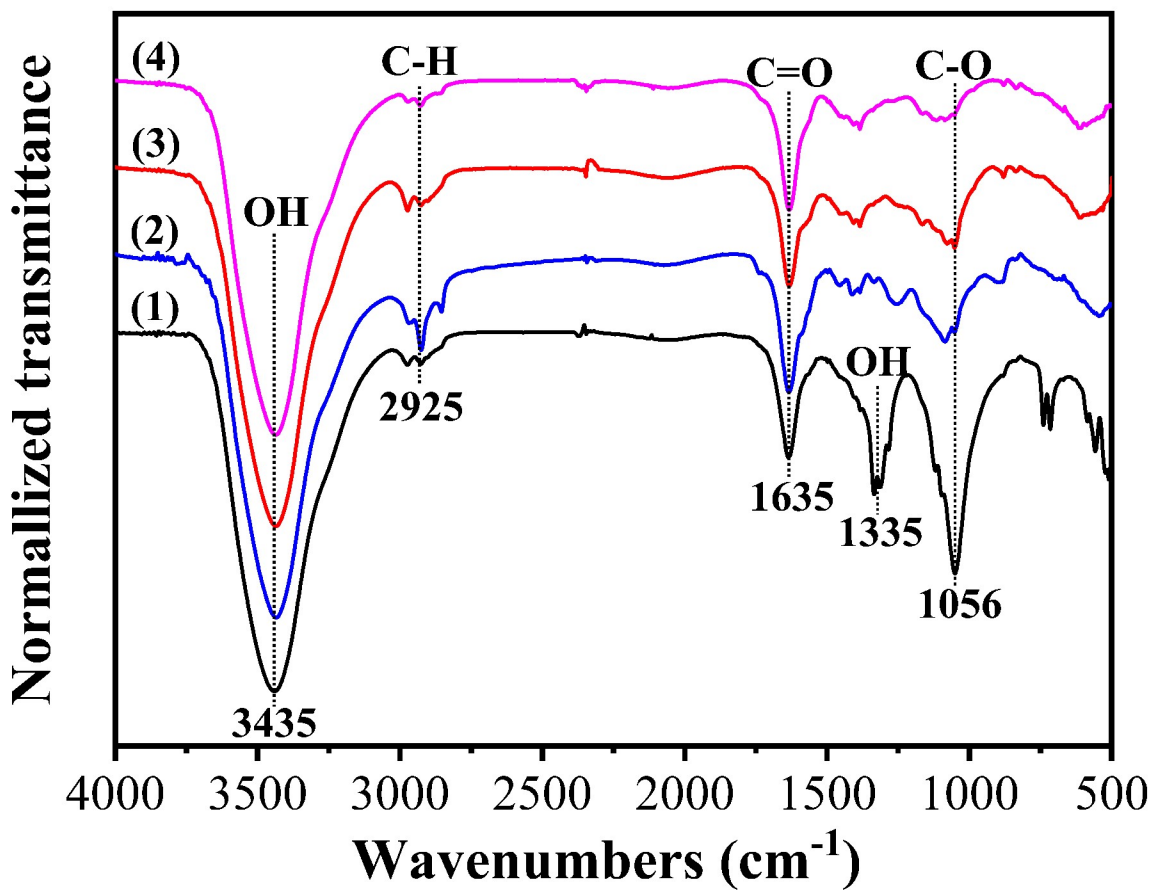

**Fig. S2.** FT-IR spectra of the samples: (1) 3D-GO obtained from 3D-GO/NF, (2) rGO powder prepared by the reduction of GO in HI acid, (3)  $\text{Co}_2\text{P}$  powder obtained from  $\text{Co}_2\text{P}/\text{NF}$ , and (4)  $\text{Co}_2\text{P}@3\text{D-rGO}$  powder obtained from  $\text{Co}_2\text{P}@3\text{D-rGO}/\text{NF}$ .

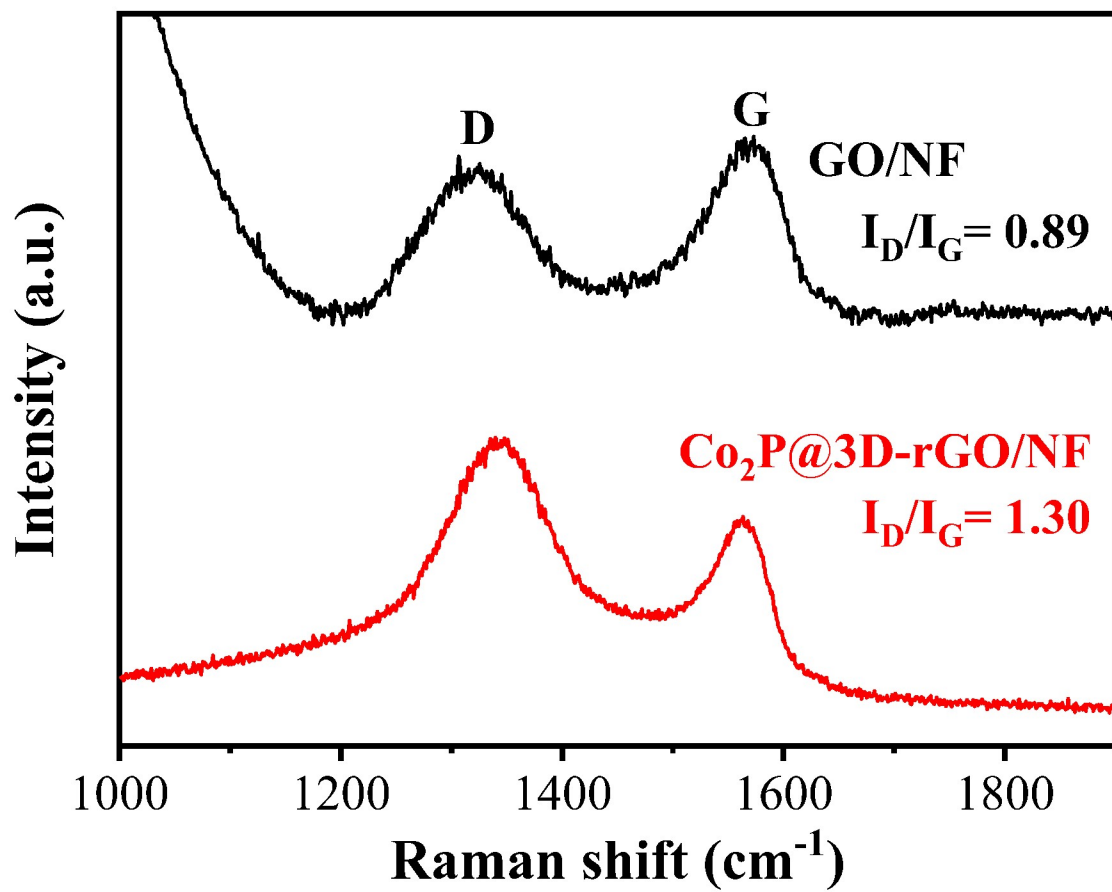

Fig. S3. Raman spectra of GO/NF and Co<sub>2</sub>P@3D-rGO/NF.

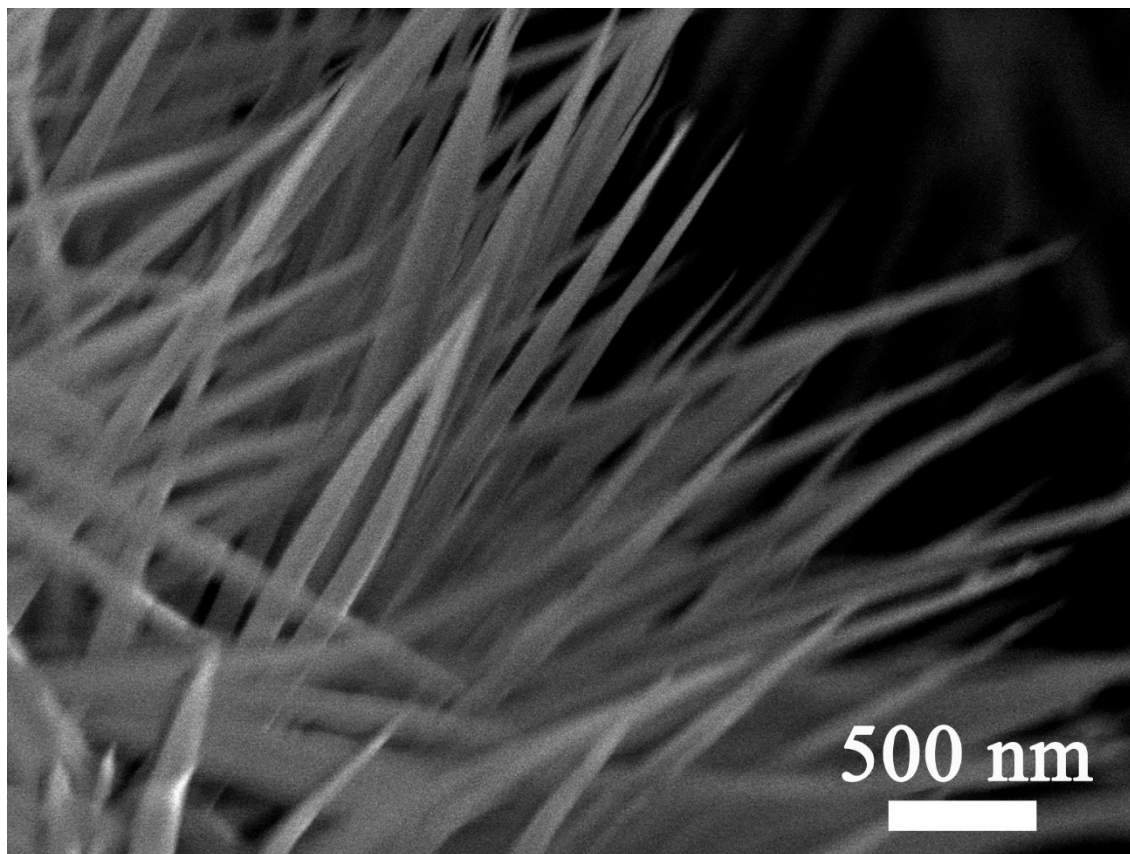

**Fig. S4.** FESEM image of  $\text{Co}(\text{CO}_3)_{0.5}(\text{OH})_{0.11} \cdot \text{H}_2\text{O} @ 3\text{D-GO/NF}$ .

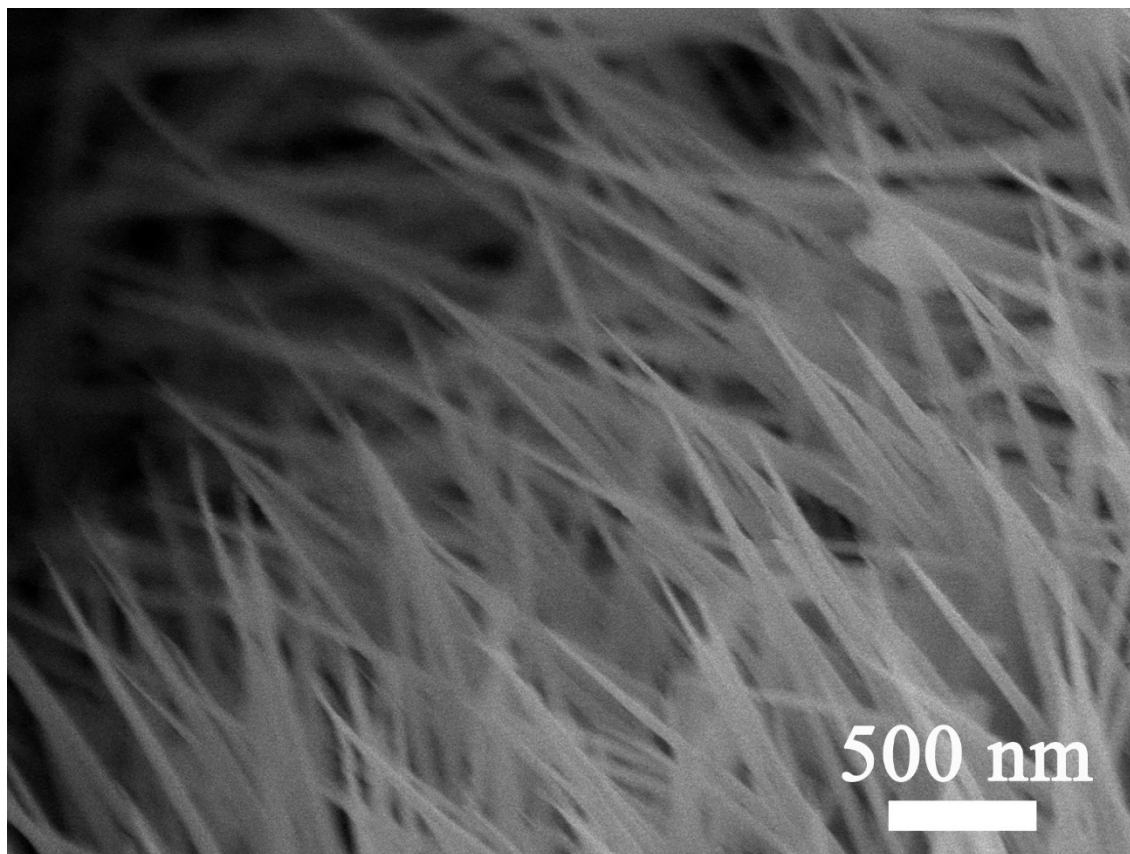

**Fig. S5.** FESEM image of CoO@3D-GO/NF.

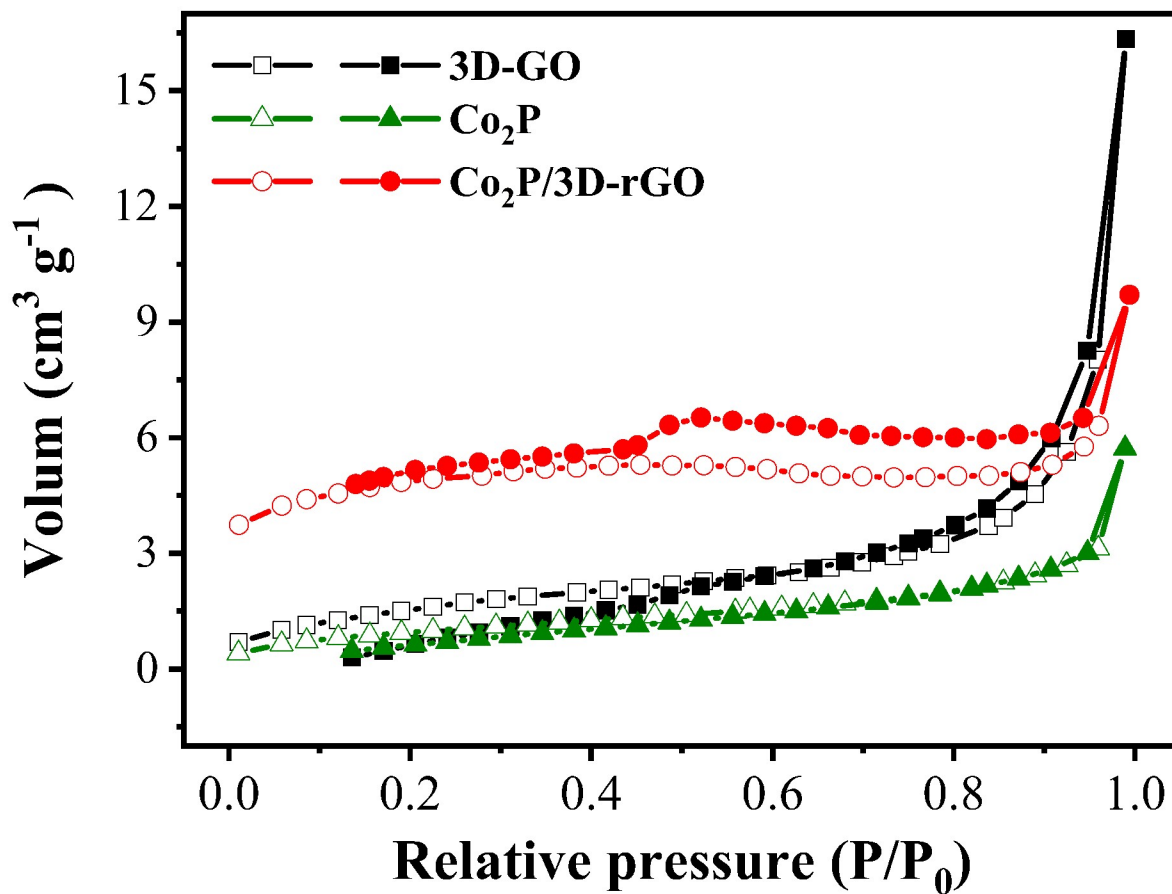

**Fig. S6.** N<sub>2</sub> adsorption-desorption isotherms of 3D-GO, Co<sub>2</sub>P, and Co<sub>2</sub>P@3D-rGO powders scraped from 3D-GO/NF, Co<sub>2</sub>P/NF and Co<sub>2</sub>P@3D-rGO/NF, respectively.

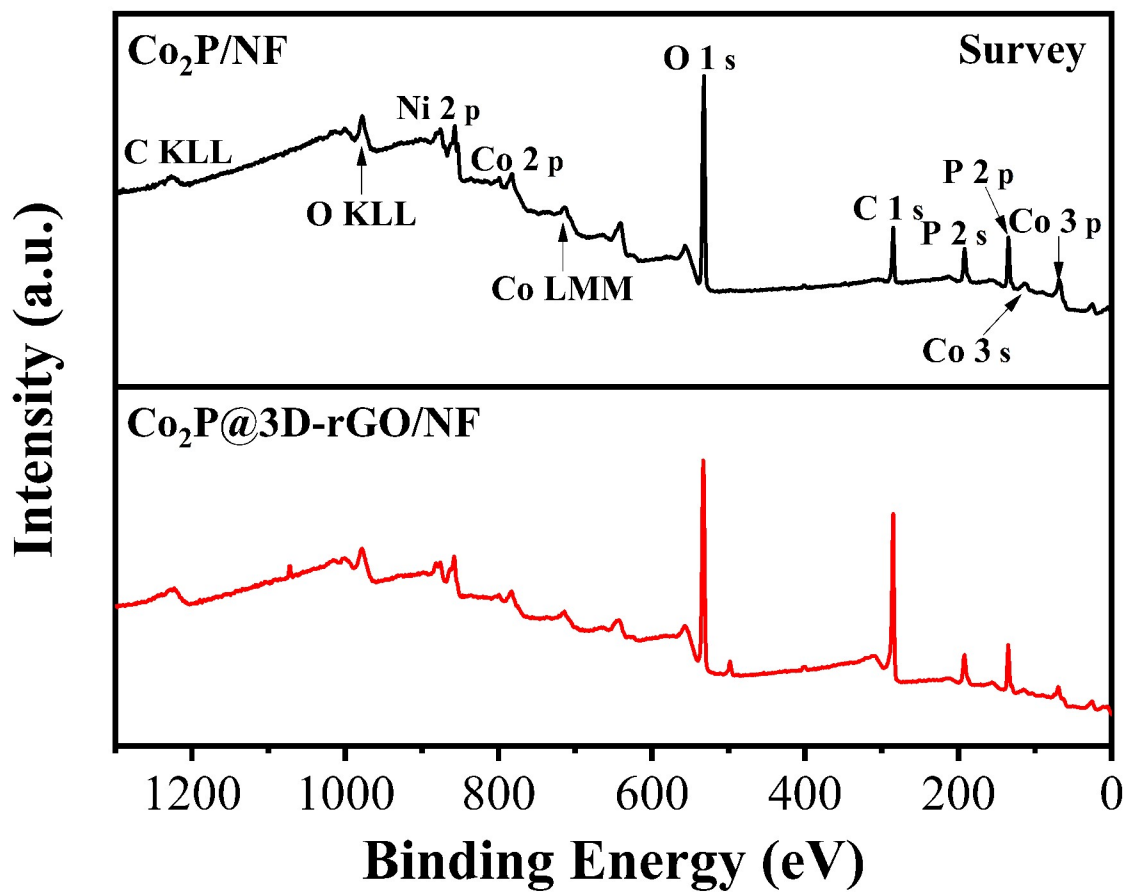

**Fig. S7.** XPS full survey spectra of Co<sub>2</sub>P/NF and Co<sub>2</sub>P@3D-rGO/NF.



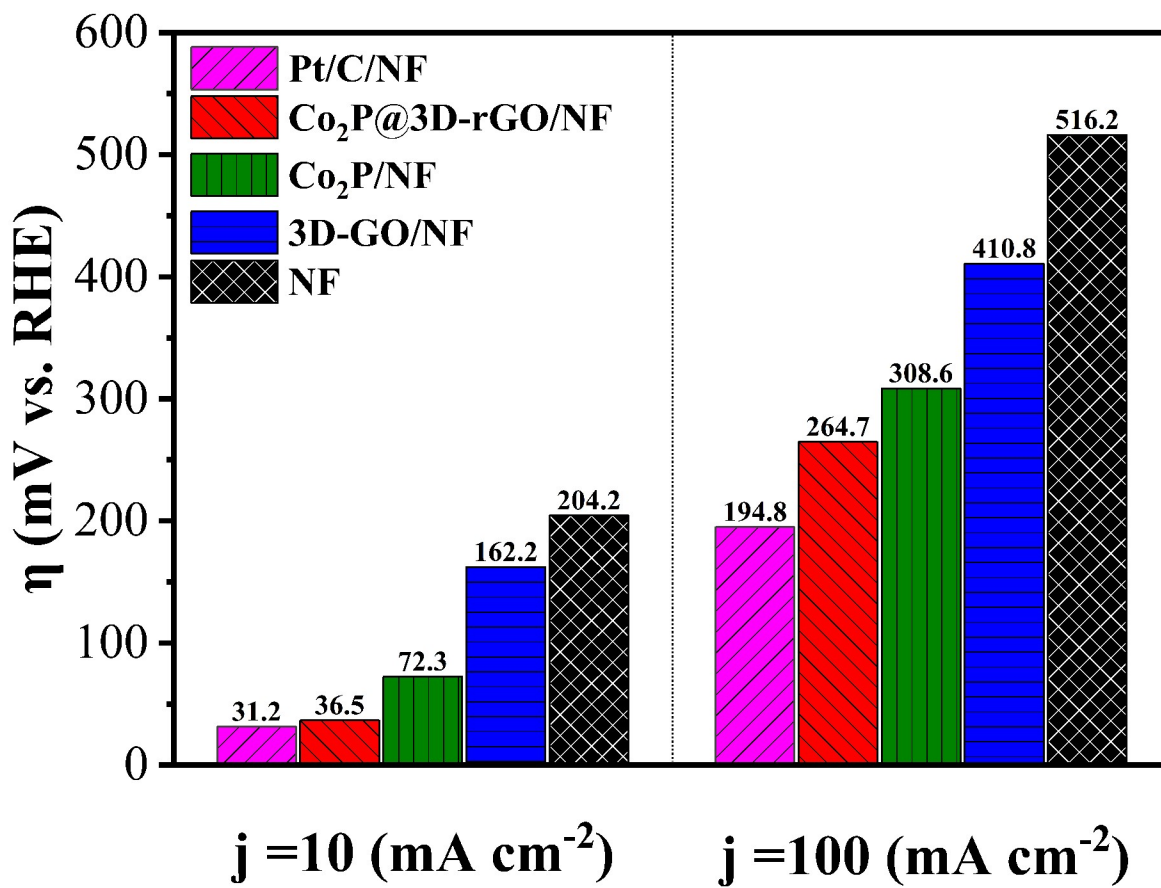

Fig. S8. HER overpotentials of the electrodes.

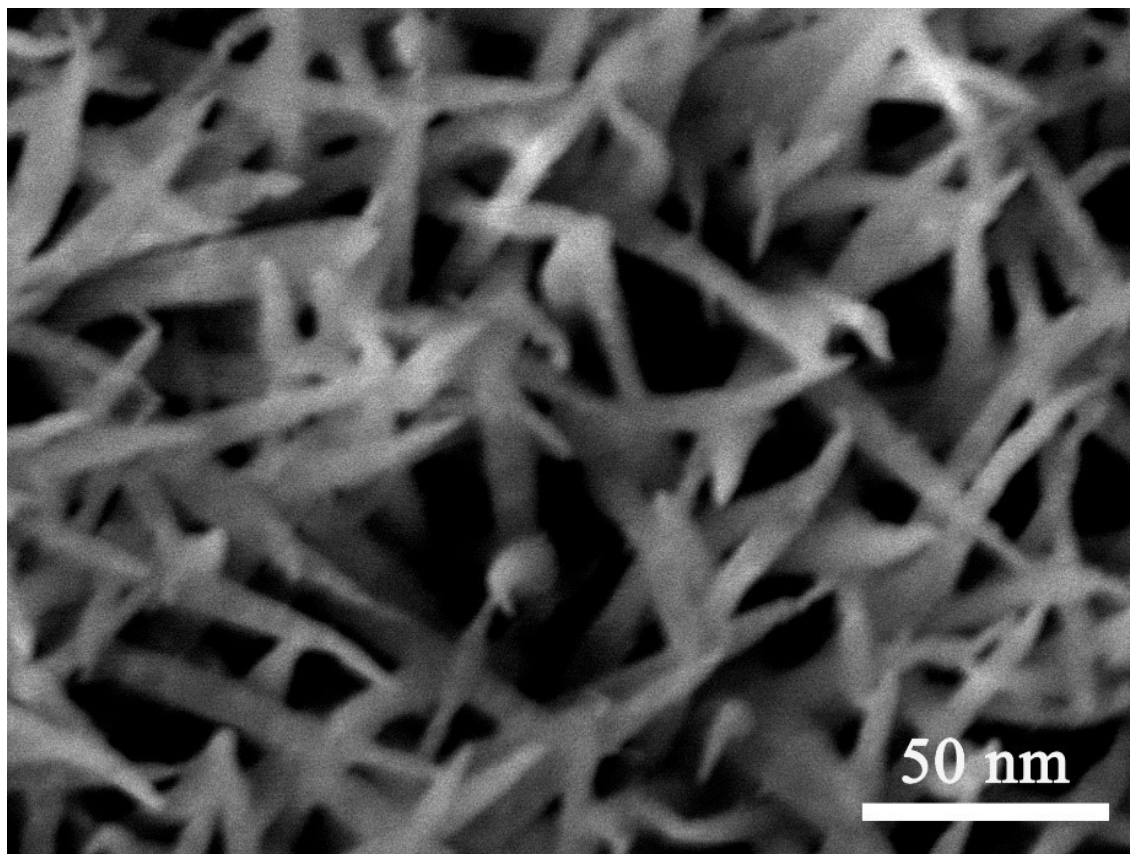

**Fig. S9.** FESEM image of  $\text{Co}_2\text{P}@3\text{D-rGO/NF}$  after the LSV test.

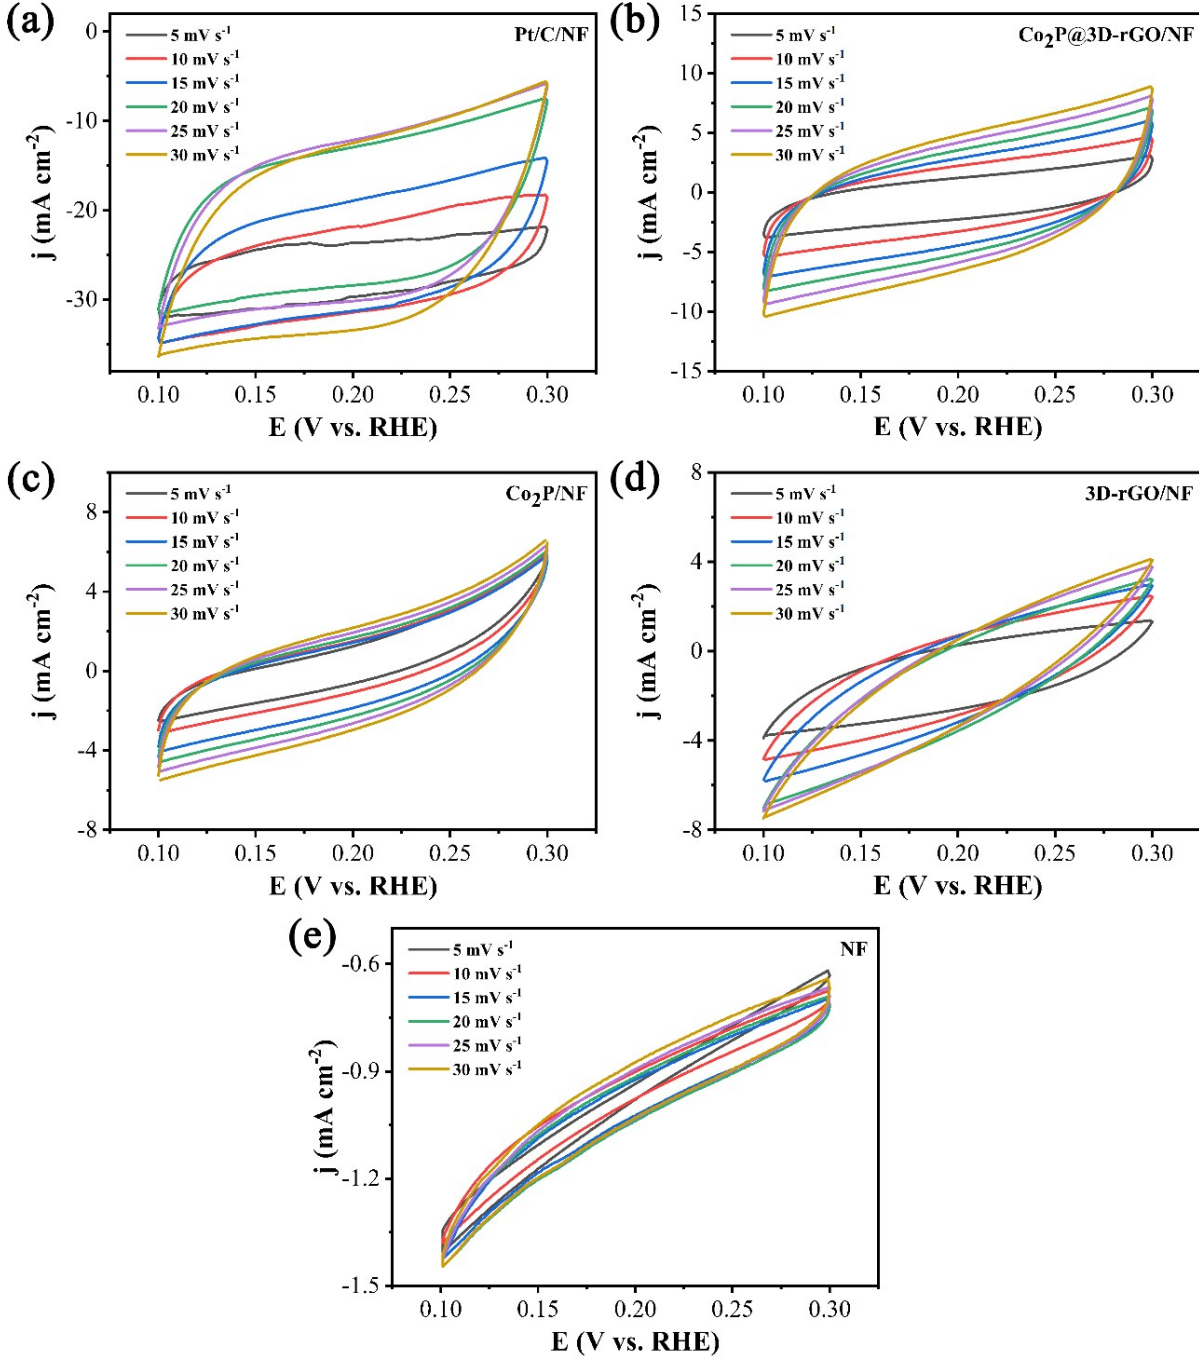

**Fig. S10.** Cyclic voltammety curves of the electrodes: (a) Pt/C/NF, (b)  $\text{Co}_2\text{P}@3\text{D-rGO}/\text{NF}$ , (c)  $\text{Co}_2\text{P}/\text{NF}$ , (d) 3D-rGO/NF, and (e) NF in a potential window (0.10 - 0.30 V vs. RHE) at various scan rates in 1.0 M KOH solution.

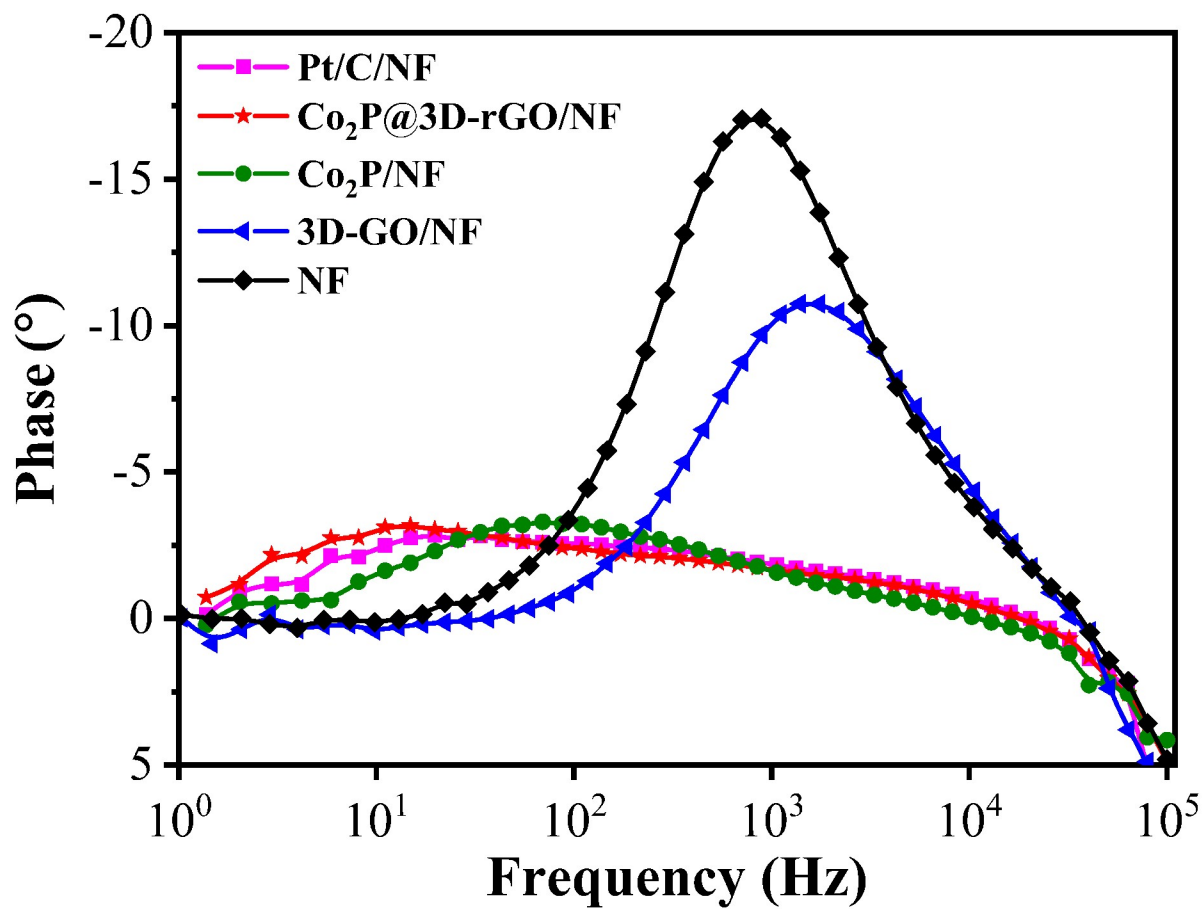

Fig. S11. Bode-phase plots of the electrodes.

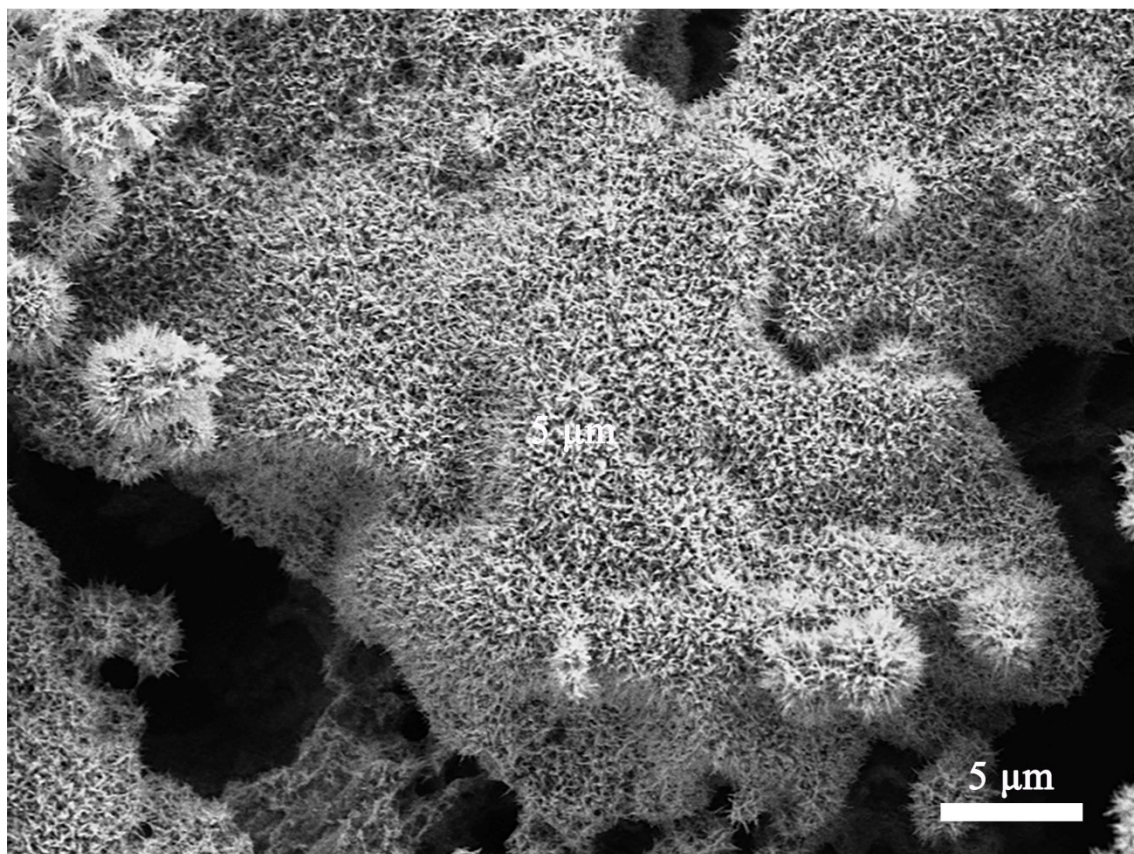

**Fig. S12.** FESEM image of Co<sub>2</sub>P@3D-rGO/NF after 2000 CV sweeps.

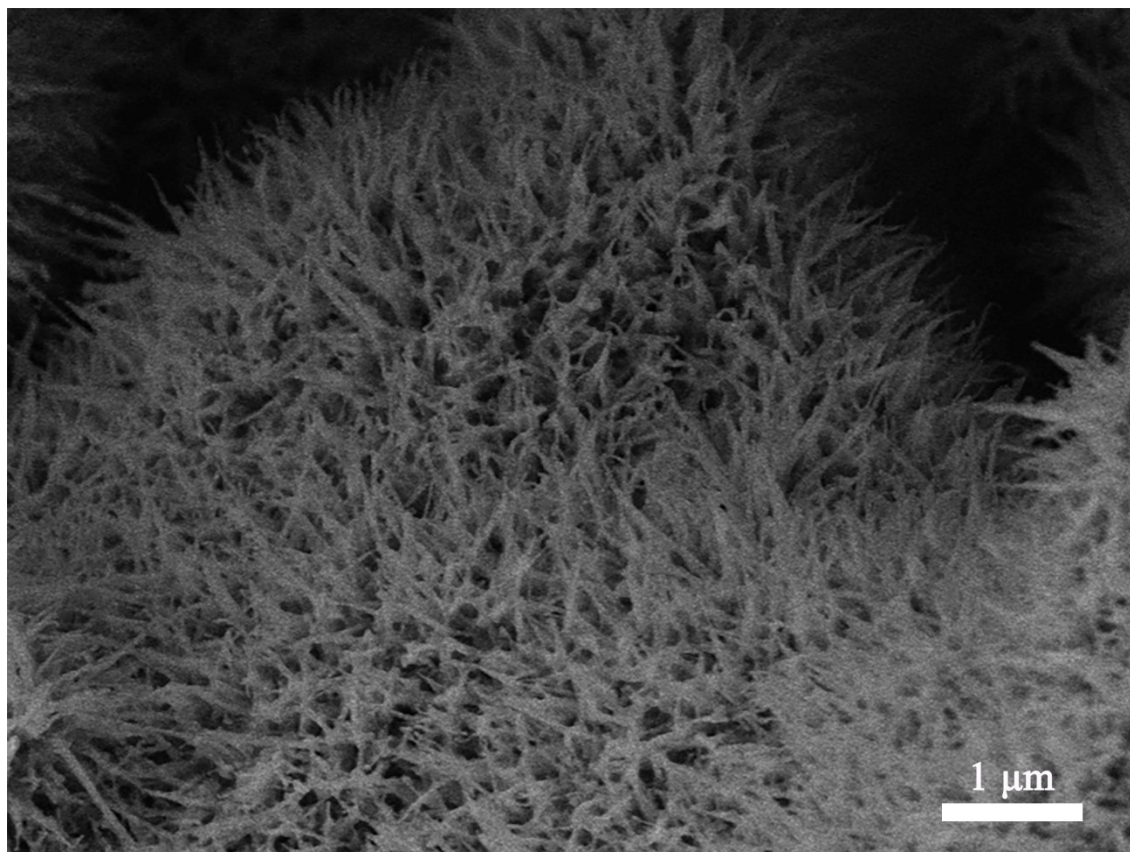

**Fig. S13.** FESEM image of Co<sub>2</sub>P@3D-rGO/NF after 20 h of chronoamperometry test.

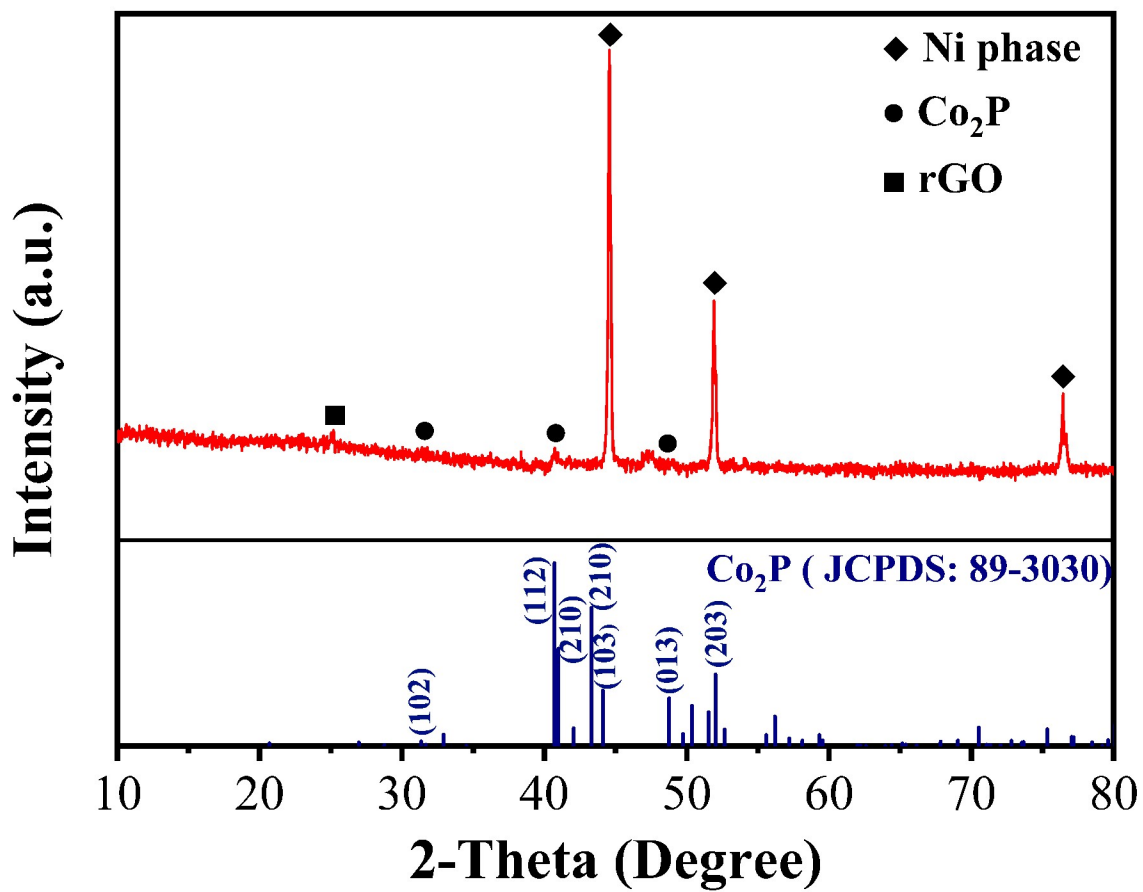

**Fig. S14.** XRD pattern of Co<sub>2</sub>P@3D-rGO/NF after 20 h of chronoamperometry test.

**Table S1** The pore properties of 3D-GO, Co<sub>2</sub>P, and Co<sub>2</sub>P@3D-rGO powders scraped from 3D-GO/NF, Co<sub>2</sub>P/NF, and Co<sub>2</sub>P@3D-rGO/NF, respectively.

| Pore properties                                                  | 3D-GO  | Co <sub>2</sub> P | Co <sub>2</sub> P@3D-rGO |
|------------------------------------------------------------------|--------|-------------------|--------------------------|
| BET surface area<br>(m <sup>2</sup> g <sup>-1</sup> )            | 15.7   | 3.6               | 6.0                      |
| BJH Adsorption Pore volume<br>(cm <sup>3</sup> g <sup>-1</sup> ) | 0.0096 | 0.0088            | 0.0255                   |
| BJH Desorption Pore volume<br>(cm <sup>3</sup> g <sup>-1</sup> ) | 0.0097 | 0.0087            | 0.0247                   |
| BJH Adsorption pore size<br>(nm)                                 | 7.5    | 10.2              | 16.8                     |
| BJH Desorption pore size<br>(nm)                                 | 6.2    | 10.6              | 15.9                     |



**Table S2** HER activities of nanocomposite electrocatalysts associated with Co<sub>2</sub>P.

| Electrocatalysts                        | Electrolyte    | $\eta(\text{mV})@j$ ( $\text{mA}\cdot\text{cm}^{-2}$ ) | Tafel Slope ( $\text{mV}\cdot\text{dec}^{-1}$ ) | Reference         |
|-----------------------------------------|----------------|--------------------------------------------------------|-------------------------------------------------|-------------------|
| CoP/Co <sub>9</sub> S <sub>8</sub> -Cu  | 1 M KOH        | 118@10                                                 | 66.75                                           | Ref <sup>1</sup>  |
| CoP@FeCoP/NC YSMPs                      | 1 M KOH        | 141@10                                                 | 56.34                                           | Ref <sup>2</sup>  |
| Co <sub>2</sub> P/CoWO <sub>4</sub> /NF | 1 M KOH        | 81@10                                                  | 79                                              | Ref <sup>3</sup>  |
| Co <sub>2</sub> P/NPSC-800              | 1 M KOH        | 173@10                                                 | 106.52                                          | Ref <sup>4</sup>  |
| Co <sub>2</sub> P NRs                   | 1 M KOH        | 151@10                                                 | --                                              | Ref <sup>5</sup>  |
| Co <sub>2</sub> P/NPSC-800              | 1 M KOH        | 173@20                                                 | 106.52                                          | Ref <sup>6</sup>  |
| Co/CoN/Co <sub>2</sub> P-NPC            | 1 M KOH        | 99@10                                                  | 51                                              | Ref <sup>7</sup>  |
| CoP/Co <sub>2</sub> P hybrids           | 1 M KOH        | 103@10                                                 | 61.2                                            | Ref <sup>8</sup>  |
| Co <sub>2</sub> P NPs                   | 1 M KOH        | 131@10                                                 | 36                                              | Ref <sup>9</sup>  |
| Co <sub>2</sub> P/CoP branched          | 1 M KOH        | 87@10                                                  | 76.8                                            | Ref <sup>10</sup> |
| Co <sub>2</sub> P/CNTs                  | 1 M KOH        | 132@10                                                 | 103                                             | Ref <sup>11</sup> |
| Fe-Co <sub>2</sub> P BNRs               | 1 M KOH        | 156@10                                                 | 90                                              | Ref <sup>12</sup> |
| <b>Co<sub>2</sub>P@3D-rGO/NF</b>        | <b>1 M KOH</b> | <b>36.5@10</b>                                         | <b>55.5</b>                                     | <b>This work</b>  |

## References:

1. Y. Pan, Y. Q. Liu, Y. Lin and C. G. Liu, *ACS Appl. Mater. Interfaces*, 2016, **8**, 13890-13901.
2. J. H. Shi, F. Qiu, W. B. Yuan, M. M. Guo and Z. H. Lu, *Chem Eng J*, 2021, **403**, 126312.
3. K. Y. Tao, H. M. Dan, Y. Hai, L. Liu and Y. Gong, *Electrochim Acta*, 2019, **328**, 135123.
4. X. W. Sun, H. Liu, G. R. Xu, J. Bai and C. P. Li, *Int J Hydrogen Energ*, 2021, **46**, 1560-1568.
5. Z. P. Huang, Z. Z. Chen, Z. B. Chen, C. C. Lv, M. G. Humphrey and C. Zhang, *Nano Energy*, 2014, **9**, 373-382.
6. Y. Li, M. N. Cui, T. J. Li, Y. Shen, Z. J. Si and H. G. Wang, *Int J Hydrogen Energ*, 2020, **45**, 16540-16549.
7. L. Hu, Y. W. Hu, R. Liu, Y. C. Mao, M. S. Balogun and Y. X. Tong, *Int J Hydrogen Energ*, 2019, **44**, 11402-11410.
8. L. Y. Chen, Y. Y. Zhang, H. F. Wang, Y. X. Wang, D. Z. Li and C. Y. Duan, *Nanoscale*, 2018, **10**, 21019-21024.
9. X. Y. Wang, C. H. Liu, C. Wu, X. M. Tian, K. Wang, W. L. Pei and Q. Wang, *Electrochim. Acta*, 2020, **330**, 135191.
10. M. J. Song, Y. He, M. M. Zhang, X. R. Zheng, Y. Wang, J. F. Zhang, X. P. Han, C. Zhong, W. B. Hu and Y. D. Deng, *J. Power Sources*, 2018, **402**, 345-352.
11. D. Das and K. K. Nanda, *Nano Energy*, 2016, **30**, 303-311.
12. Y. Lin, K. A. Sun, X. M. Chen, C. Chen, Y. Pan, X. Y. Li and J. Zhang, *J Energy Chem*, 2021, **55**, 92-101.
